# Supplementary material for: Risk factors for Candida parapsilosis bloodstream infection in a neonatal intensive care unit: a case-control study
Source: Springer Nature journal article supplement (doi:10.1186/s13052-017-0332-5), 2017-01-19
Supplement: MOESM1 [file 12114024]

**Table S1. PCR fingerprinting profiles of *C. parapsilosis* isolates**

| Patient code         | GACA4 |   |   |   |   |   |   |   |   |   | M13 |   |   |   |   | T3B |   |   |   |   | OPA-03 |   |   |   |   |   |   |   |   |   |   |   |   |   |   |   |   |   |   |   |   |   |   |   |   |   |
|----------------------|-------|---|---|---|---|---|---|---|---|---|-----|---|---|---|---|-----|---|---|---|---|--------|---|---|---|---|---|---|---|---|---|---|---|---|---|---|---|---|---|---|---|---|---|---|---|---|---|
| OM                   | 1     | 0 | 1 | 1 | 1 | 1 | 1 | 0 | 0 | A | 0   | 1 | 1 | 1 | 0 | 1   | A | 1 | 0 | 0 | 0      | 0 | 1 | 1 | 0 | A | 1 | 1 | 1 | 1 | 1 | 1 | 1 | 1 | 1 | 1 | 1 | 1 | 1 | 1 | 1 | 1 | 1 | 1 | A |   |
| G3D                  | 1     | 0 | 1 | 1 | 1 | 1 | 1 | 0 | 0 | A | 0   | 1 | 1 | 1 | 0 | 1   | A | 1 | 0 | 0 | 0      | 0 | 1 | 1 | 0 | A | 1 | 1 | 1 | 1 | 1 | 1 | 1 | 1 | 1 | 1 | 1 | 1 | 1 | 1 | 1 | 1 | 1 | 1 | A |   |
| AG                   | 1     | 0 | 1 | 1 | 1 | 1 | 1 | 0 | 0 | A | 0   | 1 | 1 | 1 | 0 | 1   | A | 1 | 0 | 0 | 0      | 0 | 1 | 1 | 0 | A | 1 | 1 | 1 | 1 | 1 | 1 | 1 | 1 | 1 | 1 | 1 | 1 | 1 | 1 | 1 | 1 | 1 | 1 | 1 | A |
| PR                   | 1     | 0 | 1 | 1 | 1 | 1 | 1 | 0 | 0 | A | 0   | 1 | 1 | 1 | 0 | 1   | A | 1 | 0 | 0 | 0      | 0 | 1 | 1 | 0 | A | 1 | 1 | 1 | 1 | 1 | 1 | 1 | 1 | 1 | 1 | 1 | 1 | 1 | 1 | 1 | 1 | 1 | 1 | 1 | A |
| BN                   | 1     | 0 | 1 | 1 | 1 | 1 | 1 | 0 | 0 | A | 0   | 1 | 1 | 1 | 0 | 1   | A | 1 | 0 | 0 | 0      | 0 | 1 | 1 | 0 | A | 1 | 1 | 1 | 1 | 1 | 1 | 1 | 1 | 1 | 1 | 1 | 1 | 1 | 1 | 1 | 1 | 1 | 1 | 1 | A |
| PG                   | 1     | 0 | 1 | 1 | 1 | 1 | 1 | 0 | 0 | A | 0   | 1 | 1 | 1 | 0 | 1   | A | 1 | 0 | 0 | 0      | 0 | 1 | 1 | 0 | A | 1 | 1 | 1 | 1 | 1 | 1 | 1 | 1 | 1 | 1 | 1 | 1 | 1 | 1 | 1 | 1 | 1 | 1 | 1 | A |
| TW                   | 1     | 0 | 1 | 1 | 1 | 1 | 1 | 0 | 0 | A | 0   | 1 | 1 | 1 | 0 | 1   | A | 1 | 0 | 0 | 0      | 0 | 1 | 1 | 0 | A | 1 | 1 | 1 | 1 | 1 | 1 | 1 | 1 | 1 | 1 | 1 | 1 | 1 | 1 | 1 | 1 | 1 | 1 | 1 | A |
| G2A                  | 1     | 0 | 1 | 1 | 1 | 1 | 1 | 0 | 0 | A | 0   | 1 | 1 | 1 | 0 | 1   | A | 1 | 0 | 0 | 0      | 0 | 1 | 1 | 0 | A | 1 | 1 | 1 | 1 | 1 | 1 | 1 | 1 | 1 | 1 | 1 | 1 | 1 | 1 | 1 | 1 | 1 | 1 | 1 | A |
| RD                   | 1     | 0 | 1 | 1 | 1 | 1 | 1 | 0 | 0 | A | 0   | 1 | 1 | 1 | 0 | 1   | A | 1 | 0 | 0 | 0      | 0 | 1 | 1 | 0 | A | 1 | 1 | 1 | 1 | 1 | 1 | 1 | 1 | 1 | 1 | 1 | 1 | 1 | 1 | 1 | 1 | 1 | 1 | 1 | A |
| DLBS                 | 1     | 0 | 1 | 1 | 1 | 1 | 1 | 0 | 0 | A | 0   | 1 | 1 | 1 | 0 | 1   | A | 1 | 0 | 0 | 0      | 0 | 1 | 1 | 0 | A | 1 | 1 | 1 | 1 | 1 | 1 | 1 | 1 | 1 | 1 | 1 | 1 | 1 | 1 | 1 | 1 | 1 | 1 | 1 | A |
| MC                   | 1     | 0 | 1 | 1 | 1 | 1 | 1 | 0 | 0 | A | 0   | 1 | 1 | 1 | 0 | 1   | A | 1 | 0 | 0 | 0      | 0 | 1 | 1 | 0 | A | 1 | 1 | 1 | 1 | 1 | 1 | 1 | 1 | 1 | 1 | 1 | 1 | 1 | 1 | 1 | 1 | 1 | 1 | 1 | A |
| OS                   | 1     | 0 | 1 | 1 | 1 | 1 | 1 | 0 | 0 | A | 0   | 1 | 1 | 1 | 0 | 1   | A | 1 | 0 | 0 | 0      | 0 | 1 | 1 | 0 | A | 1 | 1 | 1 | 1 | 1 | 1 | 1 | 1 | 1 | 1 | 1 | 1 | 1 | 1 | 1 | 1 | 1 | 1 | 1 | A |
| IC                   | 1     | 0 | 1 | 1 | 1 | 1 | 1 | 0 | 0 | A | 0   | 1 | 1 | 1 | 0 | 1   | A | 1 | 0 | 0 | 0      | 0 | 1 | 1 | 0 | A | 1 | 1 | 1 | 1 | 1 | 1 | 1 | 1 | 1 | 1 | 1 | 1 | 1 | 1 | 1 | 1 | 1 | 1 | 1 | A |
| DGR                  | 1     | 0 | 1 | 1 | 1 | 1 | 1 | 0 | 0 | A | 0   | 1 | 1 | 1 | 0 | 1   | A | 1 | 0 | 0 | 0      | 0 | 1 | 1 | 0 | A | 1 | 1 | 1 | 1 | 1 | 1 | 1 | 1 | 1 | 1 | 1 | 1 | 1 | 1 | 1 | 1 | 1 | 1 | 1 | A |
| SR                   | 1     | 0 | 1 | 1 | 1 | 1 | 1 | 0 | 0 | A | 0   | 1 | 1 | 1 | 0 | 1   | A | 1 | 0 | 0 | 0      | 0 | 1 | 1 | 0 | A | 1 | 1 | 1 | 1 | 1 | 1 | 1 | 1 | 1 | 1 | 1 | 1 | 1 | 1 | 1 | 1 | 1 | 1 | 1 | A |
| RE                   | 1     | 0 | 1 | 1 | 1 | 1 | 1 | 0 | 0 | A | 0   | 1 | 1 | 1 | 0 | 1   | A | 1 | 0 | 0 | 0      | 0 | 1 | 1 | 0 | A | 1 | 1 | 1 | 1 | 1 | 1 | 1 | 1 | 1 | 1 | 1 | 1 | 1 | 1 | 1 | 1 | 1 | 1 | 1 | A |
| RS                   | 1     | 0 | 1 | 1 | 1 | 1 | 1 | 0 | 0 | A | 0   | 1 | 1 | 1 | 0 | 1   | A | 1 | 0 | 0 | 0      | 0 | 1 | 1 | 0 | A | 1 | 1 | 1 | 1 | 1 | 1 | 1 | 1 | 1 | 1 | 1 | 1 | 1 | 1 | 1 | 1 | 1 | 1 | 1 | A |
| environmental sample | 1     | 1 | 1 | 1 | 0 | 1 | 1 | 1 | 1 | B | 1   | 0 | 0 | 1 | 1 | 1   | B | 0 | 1 | 0 | 1      | 1 | 0 | 0 | 1 | B | 1 | 1 | 1 | 0 | 0 | 1 | 0 | 1 | 1 | 1 | 1 | 1 | 1 | 1 | 1 | 1 | 1 | B |   |   |

PCR primers used to generate fingerprinting profiles are indicated. Numbers 1 and 0 indicate the presence or the absence of the PCR product, respectively.

**Table S2. Robust ANOVA and Kruskal-Wallis tests**

|                        | Robust ANOVA<br>p | Multiple Case-Control comparison test after Robust ANOVA<br>p* | Kruskal-Wallis rank sum test<br>p | Multiple Case-Control comparison test after Kruskal-Wallis<br>p* |
|------------------------|-------------------|----------------------------------------------------------------|-----------------------------------|------------------------------------------------------------------|
| Duration of Use of CVC | 0.0291            | < 0.05                                                         | 0.0298                            | < 0.05                                                           |
| Duration of Use of UC  | <0.001            | < 0.05                                                         | <0.001                            | < 0.05                                                           |
| Duration of Use of AV  | <0.001            | < 0.05                                                         | <0.001                            | < 0.05                                                           |
| Gestational Age        | <0.001            | < 0.05                                                         | <0.001                            | < 0.05                                                           |
| Birth Weight           | <0.001            | < 0.05                                                         | <0.001                            | < 0.05                                                           |
| Length of NICU Stay    | NS                | NS                                                             | NS                                | NS                                                               |

\*For all pairwise comparisons between groups.

Notes. For Robust ANOVA trimming was 20%. A bootstrap with n=5000 bootstrap samples was added to the trimmed mean.

Abbreviations: UC, umbilical catheter; CVC, central venous catheter; AV, assisted ventilation; NS, not significant.
